# Supplementary material
Source: Elsevier journal article supplement (https://www.sciencedirect.com/science/article/pii/S0366317520300212)
Supplement: mmc1 [file S0366317520300212:mmc1.docx]

Supporting information

**The effect of rod orientation on the strength of highly porous 3D ceramic architectures**

**Efecto de la orientación de los rodillos en la resistencia de arquitecturas 3D cerámicas altamente porosas**

A. Gómez-Gómez1, J. J. Moyano1,2*, M. I. Osendi1, M. Belmonte1, P. Miranzo1.

1 Instituto de Cerámica y Vidrio, Consejo Superior de Investigaciones Científicas CSIC, 28049 Madrid Spain.

2 E.T.S. de Ingenieros de Caminos, Canales y Puertos, Universidad Politécnica de Madrid, 28040 Madrid Spain.

Additional results for the mechanical tests data of the massive printed SiC materials (alike closed pore foams) testes in compression and flexural.


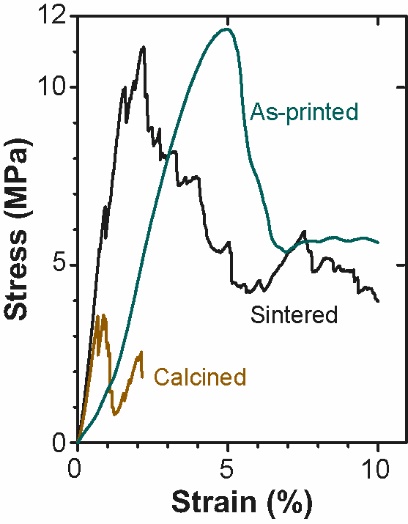


Figure S1. Stress-strain plots for the massive printed SiC specimens at the different processing steps, as-printed, calcined and sintered.

Table S1. Density, strength and elastic modulus of the massive printed SiC specimens at the different processing steps, as-printed, calcined and sintered. In parenthesis the standard deviations.

|  | Density (g cm-3) | Strength (MPa) | Elastic modulus (MPa) |
| --- | --- | --- | --- |
| As-printed | 1.3 (0.1) | 12.4 (0.7) | 404 (50) |
| Calcined | 1.2 (0.1) | 6 (2) | 621 (110) |
| Sintered | 1.2 (0.1) | 16 (6) | 3700 (220) |
